# Supplementary material for: Roles of the Maternal and Child Health Handbook and Other Home-Based Records on Newborn and Child Health: A Systematic Review
Source: MDPI journal article supplement (doi:10.3390/ijerph18147463), 2021-07-13
Supplement: s1 [file s1]

**Table S1.** Table of excluded studies with reasons

| <b>No.</b> | <b>Study ID</b>   | <b>Reasons for exclusion</b>                           |
|------------|-------------------|--------------------------------------------------------|
| 1          | Abughali 2014     | Electronic medical records                             |
| 2          | Adams 2013        | Electronic medical records                             |
| 3          | Aiga 2016         | Not related to newborn/child health outcomes           |
| 4          | Aiga 2018         | Not related to newborn/child health outcomes           |
| 5          | Aihara 2006       | Not related to newborn/child health outcomes           |
| 6          | Akashi 2018       | Not related to home-based records nor the MCH handbook |
| 7          | Akhund 2011       | Not related to newborn/child health outcomes           |
| 8          | Akiba 2016        | Not related to newborn/child health outcomes           |
| 9          | Albers 1997       | Electronic medical records                             |
| 10         | Angier 2014       | Electronic medical records                             |
| 11         | Balakrishnan 2016 | Mobile health intervention                             |
| 12         | Baqui 2019        | Not related to home-based records nor the MCH handbook |
| 13         | Bartsch 2018      | Electronic medical records                             |
| 14         | Belemsaga 2018    | Not related to home-based records nor the MCH handbook |
| 15         | Bellows 2013      | Not related to home-based records nor the MCH handbook |
| 16         | Bilenko 2017      | Not related to home-based records nor the MCH handbook |
| 17         | Boothroyd 2011    | Not related to home-based records nor the MCH handbook |
| 18         | Bose 2015         | Electronic medical records                             |
| 19         | Braeye 2019       | Electronic medical records                             |
| 20         | Bremberg 2000     | Not related to home-based records nor the MCH handbook |
| 21         | Brodgribb 2016    | Not related to home-based records nor the MCH handbook |
| 22         | Bryanton 2013     | Not related to home-based records nor the MCH handbook |
| 23         | Bundy 2013        | Electronic medical records                             |
| 24         | Carsley 2018      | Electronic medical records                             |
| 25         | Chung 2018        | Electronic medical records                             |
| 26         | Clancy 2013       | Electronic medical records                             |
| 27         | Clendon 2010      | Not related to newborn/child health outcomes           |
| 28         | Coleman 2017      | Mobile health intervention                             |
| 29         | de Hoon 2017      | Electronic medical records                             |
| 30         | DeVoe 2018        | Electronic medical records                             |
| 31         | Du Plessis 2017   | Not related to newborn/child health outcomes           |
| 32         | Elbourne 1987     | Not related to newborn/child health outcomes           |
| 33         | Ferreccio 2008    | Not related to home-based records nor the MCH handbook |
| 34         | Fiks 2006         | Electronic medical records                             |
| 35         | Fiks 2012         | Electronic medical records                             |
| 36         | Fiks 2015         | Electronic medical records                             |
| 37         | Franchetti 2014   | Not related to home-based records nor the MCH handbook |
| 38         | Froen 2016        | Electronic medical records                             |
| 39         | Fukuda 2019       | Not related to home-based records nor the MCH handbook |
| 40         | Fukushima 2016    | Not related to home-based records nor the MCH handbook |
| 41         | Guyer 2000        | Not related to home-based records nor the MCH handbook |
| 42         | Hagelin 1998      | Not related to home-based records nor the MCH handbook |
| 43         | Haider 2017       | Not related to home-based records nor the MCH handbook |
| 44         | Hampshire 2004    | Not related to newborn/child health outcomes           |
| 45         | Hasegawa 2015     | Not related to home-based records nor the MCH handbook |

|    |                    |                                                        |
|----|--------------------|--------------------------------------------------------|
| 46 | Hawley 2014        | Electronic medical records                             |
| 47 | Helle 2019         | Electronic medical records                             |
| 48 | Hidechika 2018     | Not related to home-based records nor the MCH handbook |
| 49 | Higashiyama 2013   | Not related to newborn/child health outcomes           |
| 50 | Hiura 2002         | Not related to home-based records nor the MCH handbook |
| 51 | Irwanto 2019       | Not related to newborn/child health outcomes           |
| 52 | Julius 2013        | Not related to newborn/child health outcomes           |
| 53 | Kelaher 2009       | Not related to home-based records nor the MCH handbook |
| 54 | Kelle 2015         | Electronic medical records                             |
| 55 | Khreshch 2008      | Electronic medical records                             |
| 56 | Kitayama 2014      | Electronic medical records                             |
| 57 | Kubota 2000        | Not related to home-based records nor the MCH handbook |
| 58 | Kusumayati 2007    | Not related to newborn/child health outcomes           |
| 59 | Lain 2009          | Not related to home-based records nor the MCH handbook |
| 60 | Lansdown 1996      | Not related to home-based records nor the MCH handbook |
| 61 | Leppert 1993       | Not related to home-based records nor the MCH handbook |
| 62 | Liabsuetrakul 2017 | Electronic medical records                             |
| 63 | Liberato 2016      | Electronic medical records                             |
| 64 | Little 2013        | Mobile health intervention                             |
| 65 | Luman 2009         | Not related to newborn/child health outcomes           |
| 66 | Lund 2016          | Mobile health intervention                             |
| 67 | Lupton 2017        | Mobile health intervention                             |
| 68 | Lwembe 2016        | Not related to home-based records nor the MCH handbook |
| 69 | Mahanta 2016       | Not related to home-based records nor the MCH handbook |
| 70 | Markellis 1973     | Not related to home-based records nor the MCH handbook |
| 71 | Matsumoto 1996     | Not related to newborn/child health outcomes           |
| 72 | Matsushita 2011    | Not related to newborn/child health outcomes           |
| 73 | Mawarni 2017       | Electronic medical records                             |
| 74 | McKinn 2017        | Not related to newborn/child health outcomes           |
| 75 | Mengoni 2014       | Not related to home-based records nor the MCH handbook |
| 76 | Minewaki 2019      | Not related to newborn/child health outcomes           |
| 77 | Miyake 2018        | Not related to newborn/child health outcomes           |
| 78 | Nishi 1990         | Not related to home-based records nor the MCH handbook |
| 79 | Naito 2019         | Not related to newborn/child health outcomes           |
| 80 | Odai 2014          | Not related to home-based records nor the MCH handbook |
| 81 | O'Flaherty 1987    | Not related to newborn/child health outcomes           |
| 82 | Okawa 2019         | Not related to home-based records nor the MCH handbook |
| 83 | Okereke 2015       | Not related to home-based records nor the MCH handbook |
| 84 | Ooki 2005          | Not related to home-based records nor the MCH handbook |
| 85 | Osaka 1995         | Not related to home-based records nor the MCH handbook |
| 86 | Panagiotou 1998    | Electronic medical records                             |
| 87 | Pies 2012          | Not related to home-based records nor the MCH handbook |
| 88 | Polnay 1989        | Not related to newborn/child health outcomes           |
| 89 | Popovich 2008      | Not related to home-based records nor the MCH handbook |
| 90 | Pratinidhi 2015    | Not related to home-based records nor the MCH handbook |
| 91 | Rahman 2016        | Not related to home-based records nor the MCH handbook |
| 92 | Ramraj 2018        | Not related to newborn/child health outcomes           |
| 93 | Reddaiah 1985      | Not related to newborn/child health outcomes           |

|     |                   |                                                        |
|-----|-------------------|--------------------------------------------------------|
| 94  | Reich 2010        | Not related to home-based records nor the MCH handbook |
| 95  | Riverin 2015      | Electronic medical records                             |
| 96  | Rourke 2009       | Electronic medical records                             |
| 97  | Rourke 2010       | Electronic medical records                             |
| 98  | Rourke 2013       | Electronic medical records                             |
| 99  | Sachs 2011        | Not related to newborn/child health outcomes           |
| 100 | Sadiq Sheikh 2014 | Not related to newborn/child health outcomes           |
| 101 | Saeedzai 2019     | Not related to newborn/child health outcomes           |
| 102 | Seto 2006         | Not related to newborn/child health outcomes           |
| 103 | Shimada 2017      | Not related to home-based records nor the MCH handbook |
| 104 | Spencer 2000      | Not related to home-based records nor the MCH handbook |
| 105 | Stanton 2013      | Not related to home-based records nor the MCH handbook |
| 106 | Sugi 1985         | Not related to newborn/child health outcomes           |
| 107 | Takahashi 2007    | Not related to newborn/child health outcomes           |
| 108 | Takeda 2002       | Not related to newborn/child health outcomes           |
| 109 | Takehara 2016     | Not related to home-based records nor the MCH handbook |
| 110 | Takeuchi 2014     | Not related to home-based records nor the MCH handbook |
| 111 | Talbott 2015      | Not related to home-based records nor the MCH handbook |
| 112 | Tamburlini 2011   | Not related to home-based records nor the MCH handbook |
| 113 | Tamburlini 2013   | Not related to home-based records nor the MCH handbook |
| 114 | Tanabe 2011       | Not related to newborn/child health outcomes           |
| 115 | Thomas 2011       | Not related to home-based records nor the MCH handbook |
| 116 | Tobe 2018         | Mobile health intervention                             |
| 117 | Tunçalp 2013      | Not related to home-based records nor the MCH handbook |
| 118 | Umeda 2015        | Not related to newborn/child health outcomes           |
| 119 | Uneke 2017        | Not related to home-based records nor the MCH handbook |
| 120 | Uneke 2018        | Not related to home-based records nor the MCH handbook |
| 121 | Vanosdoll 2019    | Mobile health intervention                             |
| 122 | Vincelet 2003     | Not related to newborn/child health outcomes           |
| 123 | Vinceten 2012     | Not related to home-based records nor the MCH handbook |
| 124 | Walton 2006       | Not related to newborn/child health outcomes           |
| 125 | Walton 2007       | Not related to newborn/child health outcomes           |
| 126 | Wilkinson 2010    | Not related to home-based records nor the MCH handbook |
| 127 | Wilcox 2019       | Mobile health intervention                             |
| 128 | Wilson 2014       | Mobile health intervention                             |
| 129 | Wright 2005       | Not related to newborn/child health outcomes           |
| 130 | Young 1990        | Not related to newborn/child health outcomes           |
