# Supplementary material for: Roles of the Maternal and Child Health Handbook and Other Home-Based Records on Newborn and Child Health: A Systematic Review
Source: MDPI journal article supplement (doi:10.3390/ijerph18147463), 2021-07-13
Supplement: s1 [file s1]

Table S7. GRADE table (newborn)

Question: Should home-based records (intervention) compared to no use of any home-based records (control) be used for improving newborn care seeking?

| Quality assessment                                                      |                       |                      |               |              |                      |                      | № of participants |                 | Effect                    |                                                      | Certainty                                                                                       | Importance |
|-------------------------------------------------------------------------|-----------------------|----------------------|---------------|--------------|----------------------|----------------------|-------------------|-----------------|---------------------------|------------------------------------------------------|-------------------------------------------------------------------------------------------------|------------|
| № of studies                                                            | Study design          | Risk of bias         | Inconsistency | Indirectness | Imprecision          | Other considerations | Intervention      | Control         | Relative (95% CI)         | Absolute (95% CI)                                    |                                                                                                 |            |
| Care-seeking for newborn complications (Study: Osaki, 2018 (Indonesia)) |                       |                      |               |              |                      |                      |                   |                 |                           |                                                      |                                                                                                 |            |
| 1                                                                       | randomised trials     | serious <sup>a</sup> | not serious   | not serious  | serious <sup>b</sup> | none                 | 19/183 (10.4%)    | 9/271 (3.3%)    | OR 3.37<br>(1.49 to 7.63) | 71 more per 1,000<br>(from 15 more to 174 more)      | <br>LOW      | CRITICAL   |
| Care-seeking after delivery (study: Kaneko, 2017 (Burundi))             |                       |                      |               |              |                      |                      |                   |                 |                           |                                                      |                                                                                                 |            |
| 1                                                                       | observational studies | not serious          | not serious   | not serious  | not serious          | none                 | 133/370 (35.9%)   | 221/344 (64.2%) | OR 0.31<br>(0.23 to 0.42) | 285 fewer per 1,000<br>(from 350 fewer to 212 fewer) | <br>LOW      | CRITICAL   |
| Use of laboratory services (study: Haeri Mazanderani (South Africa))    |                       |                      |               |              |                      |                      |                   |                 |                           |                                                      |                                                                                                 |            |
| 1                                                                       | observational studies | serious <sup>c</sup> | not serious   | not serious  | not serious          | none                 | 326/635 (51.3%)   | Not reported    | Not calculated            | Not calculated                                       | <br>VERY LOW | IMPORTANT  |

CI: Confidence interval; OR: Odds ratio

Explanations

- a. Bias arising from the randomization process and measurement of the outcome
- b. Low number of events (< 50)
- c. The participation rate of eligible persons and loss to follow-up after baseline cannot be determined.

Question: Should home-based records (intervention) compared to no use of any home-based records (control) be used for improving newborn care knowledge?

| Quality assessment                                       |                       |              |               |              |             |                      | № of participants |                 | Effect                    |                                                  | Certainty   | Importance |
|----------------------------------------------------------|-----------------------|--------------|---------------|--------------|-------------|----------------------|-------------------|-----------------|---------------------------|--------------------------------------------------|-------------|------------|
| № of studies                                             | Study design          | Risk of bias | Inconsistency | Indirectness | Imprecision | Other considerations | Intervention      | Control         | Relative (95% CI)         | Absolute (95% CI)                                |             |            |
| Immediate breastfeeding (study: Nasir, 2017 (Indonesia)) |                       |              |               |              |             |                      |                   |                 |                           |                                                  |             |            |
| 1                                                        | observational studies | not serious  | not serious   | not serious  | not serious | none                 | 199/214 (93.0%)   | 176/213 (82.6%) | OR 2.79<br>(1.48 to 5.25) | 104 more per 1,000<br>(from 49 more to 135 more) | ⊕⊕○○<br>LOW | CRITICAL   |
| Giving colostrum (study: Nasir, 2017 (Indonesia))        |                       |              |               |              |             |                      |                   |                 |                           |                                                  |             |            |
| 1                                                        | observational studies | not serious  | not serious   | not serious  | not serious | none                 | 199/214 (93.0%)   | 184/213 (86.4%) | OR 2.09<br>(1.09 to 4.02) | 66 more per 1,000<br>(from 10 more to 98 more)   | ⊕⊕○○<br>LOW | CRITICAL   |

| Quality assessment                                                      |                       |              |               |              |             |                      | № of participants |                 | Effect                     |                                                   | Certainty                                                                                    | Importance |
|-------------------------------------------------------------------------|-----------------------|--------------|---------------|--------------|-------------|----------------------|-------------------|-----------------|----------------------------|---------------------------------------------------|----------------------------------------------------------------------------------------------|------------|
| № of studies                                                            | Study design          | Risk of bias | Inconsistency | Indirectness | Imprecision | Other considerations | Intervention      | Control         | Relative (95% CI)          | Absolute (95% CI)                                 |                                                                                              |            |
| Exclusive breastfeeding duration (study: Nasir, 2017 (Indonesia))       |                       |              |               |              |             |                      |                   |                 |                            |                                                   |                                                                                              |            |
| 1                                                                       | observational studies | not serious  | not serious   | not serious  | not serious | none                 | 194/214 (90.7%)   | 156/213 (73.2%) | OR 3.54<br>(2.04 to 6.15)  | 174 more per 1,000<br>(from 116 more to 212 more) | <br>LOW   | CRITICAL   |
| Use of antibiotic for eyes (study: Nasir, 2017 (Indonesia))             |                       |              |               |              |             |                      |                   |                 |                            |                                                   |                                                                                              |            |
| 1                                                                       | observational studies | not serious  | not serious   | not serious  | not serious | none                 | 147/214 (68.7%)   | 69/213 (32.4%)  | OR 4.58<br>(3.05 to 6.88)  | 363 more per 1,000<br>(from 270 more to 443 more) | <br>LOW   | IMPORTANT  |
| Hepatitis B immunization at birth (study: Nasir, 2017 (Indonesia))      |                       |              |               |              |             |                      |                   |                 |                            |                                                   |                                                                                              |            |
| 1                                                                       | observational studies | not serious  | not serious   | not serious  | not serious | none                 | 120/214 (56.1%)   | 96/213 (45.1%)  | OR 1.56<br>(1.06 to 2.28)  | 111 more per 1,000<br>(from 14 more to 201 more)  | <br>LOW   | CRITICAL   |
| Thermal protection (study: Nasir, 2017 (Indonesia))                     |                       |              |               |              |             |                      |                   |                 |                            |                                                   |                                                                                              |            |
| 1                                                                       | observational studies | not serious  | not serious   | not serious  | not serious | none                 | 208/214 (97.2%)   | 191/213 (89.7%) | OR 3.99<br>(1.59 to 10.06) | 75 more per 1,000<br>(from 36 more to 92 more)    | <br>LOW   | IMPORTANT  |
| Cord care (study: Nasir, 2017 (Indonesia))                              |                       |              |               |              |             |                      |                   |                 |                            |                                                   |                                                                                              |            |
| 1                                                                       | observational studies | not serious  | not serious   | not serious  | not serious | none                 | 171/214 (79.9%)   | 66/213 (31.0%)  | OR 8.86<br>(5.69 to 13.79) | 489 more per 1,000<br>(from 409 more to 551 more) | <br>LOW   | IMPORTANT  |
| Recognize the danger signs in newborns (study: Nasir, 2017 (Indonesia)) |                       |              |               |              |             |                      |                   |                 |                            |                                                   |                                                                                              |            |
| 1                                                                       | observational studies | not serious  | not serious   | not serious  | not serious | none                 | 170/214 (79.4%)   | 115/213 (54.0%) | OR 3.29<br>(2.15 to 5.05)  | 254 more per 1,000<br>(from 176 more to 316 more) | <br>LOW | CRITICAL   |

**CI:** Confidence interval; **OR:** Odds ratio

**Question:** Should home-based records (intervention) compared to no use of any home-based records (control) be used for improving newborn care practices?

| Certainty assessment                                                                             |                       |                      |               |              |                      |                                                                | № of participants |                 | Effect                 |                                               | Certainty                                                                                       | Importance |
|--------------------------------------------------------------------------------------------------|-----------------------|----------------------|---------------|--------------|----------------------|----------------------------------------------------------------|-------------------|-----------------|------------------------|-----------------------------------------------|-------------------------------------------------------------------------------------------------|------------|
| № of studies                                                                                     | Study design          | Risk of bias         | Inconsistency | Indirectness | Imprecision          | Other considerations                                           | Intervention      | Control         | Relative (95% CI)      | Absolute (95% CI)                             |                                                                                                 |            |
| Immediate breastfeeding (study: Mori, 2015 (Mongolia) )                                          |                       |                      |               |              |                      |                                                                |                   |                 |                        |                                               |                                                                                                 |            |
| 1                                                                                                | randomised trials     | serious <sup>a</sup> | not serious   | not serious  | not serious          | 12 participants in the control group received the intervention | 251/252 (99.6%)   | 244/246 (99.2%) | RR 1.07 (0.97 to 1.18) | 69 more per 1,000 (from 30 fewer to 179 more) | <br>MODERATE | CRITICAL   |
| Good newborn care and self-care (studies: Shah, 1993 (multi-countries); Nasir, 2017 (Indonesia)) |                       |                      |               |              |                      |                                                                |                   |                 |                        |                                               |                                                                                                 |            |
| 2                                                                                                | observational studies | serious <sup>b</sup> | not serious   | not serious  | serious <sup>c</sup> | none                                                           | Not reported      | Not reported    | OR 1.81 (1.24 to 2.66) | 2 fewer per 1,000 (from 3 fewer to 1 fewer)   | <br>VERY LOW | CRITICAL   |

CI: Confidence interval; RR: Risk ratio; OR: Odds ratio

Explanations

- a. Bias in measurement of the outcome.
- b. Serious concerns regarding confounding variables and selective outcome reporting in Shah, 1993
- c. Number of events not reported.

**Question:** Should home-based records (intervention) compared to no use of any home-based records (control) be used for improving perinatal mortality and morbidity?

| Qualityassessment                              |                   |                      |               |              |                           |                                                                | № of participants      |                        | Effect                             |                                             | Certainty                                                                                      | Importance |
|------------------------------------------------|-------------------|----------------------|---------------|--------------|---------------------------|----------------------------------------------------------------|------------------------|------------------------|------------------------------------|---------------------------------------------|------------------------------------------------------------------------------------------------|------------|
| № of studies                                   | Study design      | Risk of bias         | Inconsistency | Indirectness | Imprecision               | Other considerations                                           | Intervention           | Control                | Relative (95% CI)                  | Absolute (95% CI)                           |                                                                                                |            |
| Neonatal deaths (study: Mori, 2015 (Mongolia)) |                   |                      |               |              |                           |                                                                |                        |                        |                                    |                                             |                                                                                                |            |
| 1                                              | randomised trials | serious <sup>a</sup> | not serious   | not serious  | very serious <sup>b</sup> | 12 participants in the control group received the intervention | 1/253 (0.4%)           | 2/248 (0.8%)           | RR 1.00 (0.99 to 1.02)             | 0 fewer per 1,000 (from 0 fewer to 0 fewer) |  VERY LOW | IMPORTANT  |
| APGAR score (study: Mori, 2015 (Mongolia))     |                   |                      |               |              |                           |                                                                |                        |                        |                                    |                                             |                                                                                                |            |
| 1                                              | randomised trials | serious <sup>a</sup> | not serious   | not serious  | not serious               | 12 participants in the control group received the intervention | Mean (SD): 7.55 (0.89) | Mean (SD): 7.34 (1.25) | Mean difference: 0.21 (-0.21-0.63) | Not calculated                              |  MODERATE | IMPORTANT  |

CI: Confidence interval; RR: Risk ratio

Explanations

- a. Bias in measurement of the outcome.
- b. Very low number of events (<100)

Question: Should a different type of home-based record (intervention) compared to a standard home-based record (control) be used for improving newborn care knowledge?

| Quality assessment                                                   |                   |                      |               |              |                      |                      | № of participants                                                        |                                                                          | Effect                                             |                   | Certainty                                                                                  | Importance |
|----------------------------------------------------------------------|-------------------|----------------------|---------------|--------------|----------------------|----------------------|--------------------------------------------------------------------------|--------------------------------------------------------------------------|----------------------------------------------------|-------------------|--------------------------------------------------------------------------------------------|------------|
| № of studies                                                         | Study design      | Risk of bias         | Inconsistency | Indirectness | Imprecision          | Other considerations | Intervention                                                             | Control                                                                  | Relative (95% CI)                                  | Absolute (95% CI) |                                                                                            |            |
| Immediate breastfeeding (assessed with: Yanagisawa, 2015 (Cambodia)) |                   |                      |               |              |                      |                      |                                                                          |                                                                          |                                                    |                   |                                                                                            |            |
| 1                                                                    | randomised trials | serious <sup>a</sup> | not serious   | not serious  | serious <sup>b</sup> | none                 | Pre-intervention: 23.8%<br>Post-intervention: 40.0%<br>Difference: 16.2% | Pre-intervention: 30.0%<br>Post-intervention: 40.0%<br>Difference: 10.0% | Difference-in-differences: 6.2%<br>OR not reported | Not calculated    | <br>LOW | CRITICAL   |

CI: Confidence interval

Explanations

- a. Bias arising from the randomization process.
- b. The sample size and event numbers are not available.

Question: Should a different type of home-based record (intervention) compared to a standard home-based record (control) be used for improving newborn care practices?

| Quality assessment                                         |                   |                      |               |              |                      |                      | № of participants |                | Effect                    |                                                   | Certainty                                                                                    | Importance |
|------------------------------------------------------------|-------------------|----------------------|---------------|--------------|----------------------|----------------------|-------------------|----------------|---------------------------|---------------------------------------------------|----------------------------------------------------------------------------------------------|------------|
| № of studies                                               | Study design      | Risk of bias         | Inconsistency | Indirectness | Imprecision          | Other considerations | Intervention      | Control        | Relative (95% CI)         | Absolute (95% CI)                                 |                                                                                              |            |
| Immediate breastfeeding (assessed with: Lovell, 1987 (UK)) |                   |                      |               |              |                      |                      |                   |                |                           |                                                   |                                                                                              |            |
| 1                                                          | randomised trials | serious <sup>a</sup> | not serious   | not serious  | serious <sup>b</sup> | none                 | 77/98 (78.6%)     | 81/105 (77.1%) | OR 1.09<br>(0.56 to 2.11) | 15 more per 1,000<br>(from 117 fewer to 105 more) | <br>LOW | CRITICAL   |

CI: Confidence interval; OR: Odds ratio

Explanations

- a. Bias due to deviations from intended intervention and in the measurement of the outcome
- b. The population comprised of a higher proportion of one-parent families, high unemployment rate, and a quarter sample included west Indian and other racial groups disproportionately affected by social deprivation.

**Question:** Should a different type of home-based record (intervention) compared to a standard home-based record (control) be used for improving perinatal mortality and morbidity?

| Quality assessment                                             |                   |                      |               |                      |                           |                      | № of participants |              | Effect                    |                                                 | Certainty                                                                                       | Importance |
|----------------------------------------------------------------|-------------------|----------------------|---------------|----------------------|---------------------------|----------------------|-------------------|--------------|---------------------------|-------------------------------------------------|-------------------------------------------------------------------------------------------------|------------|
| № of studies                                                   | Study design      | Risk of bias         | Inconsistency | Indirectness         | Imprecision               | Other considerations | Intervention      | Control      | Relative (95% CI)         | Absolute (95% CI)                               |                                                                                                 |            |
| Neonatal death or stillborn (assessed with: Lovell, 1987 (UK)) |                   |                      |               |                      |                           |                      |                   |              |                           |                                                 |                                                                                                 |            |
| 1                                                              | randomised trials | serious <sup>a</sup> | not serious   | serious <sup>b</sup> | very serious <sup>c</sup> | none                 | 2/104 (1.9%)      | 2/104 (1.9%) | OR 1.04<br>(0.14 to 7.52) | 1 more per 1,000<br>(from 16 fewer to 109 more) | <br>VERY LOW | CRITICAL   |

CI: Confidence interval; OR: Odds ratio

## Explanations

- a. Bias due to deviations from intended intervention and in the measurement of the outcome
- b. The population comprised of a higher proportion of one-parent families, high unemployment rate, and a quarter sample included west Indian and other racial groups disproportionately affected by social deprivation
- c. Wide confidence interval and small number of events (<10)

Table S7. GRADE Table (children)

Question: Should home-based records (intervention) compared to no use of any home-based records (control) be used for improving children vaccination use/uptake?

| Quality assessment                                              |                       |                           |               |                      |                      |                      | № of participants             |                  | Effect                                                                          |                                                    | Certainty                                                                                       | Importance |
|-----------------------------------------------------------------|-----------------------|---------------------------|---------------|----------------------|----------------------|----------------------|-------------------------------|------------------|---------------------------------------------------------------------------------|----------------------------------------------------|-------------------------------------------------------------------------------------------------|------------|
| № of studies                                                    | Study design          | Risk of bias              | Inconsistency | Indirectness         | Imprecision          | Other considerations | Intervention                  | Control          | Relative (95% CI)                                                               | Absolute (95% CI)                                  |                                                                                                 |            |
| DTP3 completion (study: Lakhani, 1984 (UK); Stille, 2001 (USA)) |                       |                           |               |                      |                      |                      |                               |                  |                                                                                 |                                                    |                                                                                                 |            |
| 2                                                               | randomised trials     | very serious <sup>a</sup> | not serious   | serious <sup>b</sup> | not serious          | none                 | 126/313 (40.3%)               | 136/301 (45.2%)  | RR 0.89<br>(0.64 to 1.24)                                                       | 50 fewer per 1,000<br>(from 163 fewer to 108 more) | <br>VERY LOW | CRITICAL   |
| Rotavirus vaccination (study: Inoue, 2015 (Japan))              |                       |                           |               |                      |                      |                      |                               |                  |                                                                                 |                                                    |                                                                                                 |            |
| 1                                                               | observational studies | very serious <sup>c</sup> | not serious   | not serious          | not serious          | none                 | 126/376 (33.5%)               | No control group | Not reported                                                                    | Not calculated                                     | <br>VERY LOW | CRITICAL   |
| BCG and polio vaccination (study: Yamamoto, 1998 (Japan))       |                       |                           |               |                      |                      |                      |                               |                  |                                                                                 |                                                    |                                                                                                 |            |
| 1                                                               | observational studies | very serious <sup>d</sup> | not serious   | not serious          | not serious          | none                 | 281/302 (93.0%)               | No control group | Not reported                                                                    | Not calculated                                     | <br>VERY LOW | CRITICAL   |
| Mumps, measles, chicken pox (study: Kimura, 2010 (Japan))       |                       |                           |               |                      |                      |                      |                               |                  |                                                                                 |                                                    |                                                                                                 |            |
| 1                                                               | observational studies | very serious <sup>c</sup> | not serious   | not serious          | serious <sup>e</sup> | none                 | Number of events not reported | No control group | Vaccination coverage:<br>Before elementary: 8.5-13.9%<br>6th graders: 8.5-13.2% | Not calculated                                     | <br>VERY LOW | CRITICAL   |

CI: Confidence interval; RR: Risk ratio

Explanations

- a. Bias in measurement of the outcome and Stille (2001) was a non-randomized design.
- b. Differences in intervention design and DTP3 completion measurement
- c. Exposure measures are not clearly defined, and key potential confounding variables not measured and adjusted statistically.
- d. Some methodological considerations and key potential confounding variables not measured and adjusted statistically.
- e. Unable to assess the number of events as not reported

**Question:** Should home-based records (intervention) compared to no use of any home-based records (control) be used for improving vaccination history/records?

| Quality assessment                                                                                                                                                                                                                                                                       |                       |                      |                      |                      |             |                      | № of participants  |                                  | Effect                                                             |                   | Certainty                           | Importance |
|------------------------------------------------------------------------------------------------------------------------------------------------------------------------------------------------------------------------------------------------------------------------------------------|-----------------------|----------------------|----------------------|----------------------|-------------|----------------------|--------------------|----------------------------------|--------------------------------------------------------------------|-------------------|-------------------------------------|------------|
| № of studies                                                                                                                                                                                                                                                                             | Study design          | Risk of bias         | Inconsistency        | Indirectness         | Imprecision | Other considerations | home-based records | no use of any home-based records | Relative (95% CI)                                                  | Absolute (95% CI) |                                     |            |
| Vaccination history/records (studies: Kanno, 1988 (Japan); Jeffs, 1994 (Australia); McMaster, 1996 (Bosnia and Herzegovina); Kreuter, 2004 (USA); Mukanga, 2006 (Uganda); Shimizu, 2007 (Dominican Republic); McElligott, 2010 (USA); Abbott, 2013 (Australia); Ogasawara, 2016 (Japan)) |                       |                      |                      |                      |             |                      |                    |                                  |                                                                    |                   |                                     |            |
| 9                                                                                                                                                                                                                                                                                        | observational studies | serious <sup>a</sup> | serious <sup>b</sup> | serious <sup>c</sup> | not serious | none                 | Not estimable      | Not estimable                    | More up-to-date immunization status seen in the intervention group | Not calculated    | <div>⊕○○○</div> <div>VERY LOW</div> | CRITICAL   |

CI: Confidence interval

Explanations

- a. Some methodological considerations and key potential confounding variables not measured nor adjusted statistically.
- b. McMaster (1996) reported a mixed effect on the outcome; all others reported a significant effect.
- c. Differences in the measurement of the outcome.

**Question:** Should home-based records (intervention) compared to no use of any home-based records (control) be used for improving childcare-seeking?

| Quality assessment                                                                                          |                       |                      |               |                      |                           |                      | № of participants                                                                                                                                  |                                                                                                                                                                            | Effect                                                                                                                                                                                               |                   | Certainty                                                                                         | Importance |
|-------------------------------------------------------------------------------------------------------------|-----------------------|----------------------|---------------|----------------------|---------------------------|----------------------|----------------------------------------------------------------------------------------------------------------------------------------------------|----------------------------------------------------------------------------------------------------------------------------------------------------------------------------|------------------------------------------------------------------------------------------------------------------------------------------------------------------------------------------------------|-------------------|---------------------------------------------------------------------------------------------------|------------|
| № of studies                                                                                                | Study design          | Risk of bias         | Inconsistency | Indirectness         | Imprecision               | Other considerations | Intervention                                                                                                                                       | Control                                                                                                                                                                    | Relative (95% CI)                                                                                                                                                                                    | Absolute (95% CI) |                                                                                                   |            |
| Care-seeking for child illnesses (RCT) (studies: Osaki, 2018 (Indonesia); Grøvdal, 2006 (Norway))           |                       |                      |               |                      |                           |                      |                                                                                                                                                    |                                                                                                                                                                            |                                                                                                                                                                                                      |                   |                                                                                                   |            |
| 2                                                                                                           | randomised trials     | serious <sup>a</sup> | not serious   | serious <sup>b</sup> | very serious <sup>c</sup> | none                 | Osaki (2018): 75.8% sought care among the reported child illnesses                                                                                 | Osaki (2018): 71.2% sought care among the reported child illnesses<br>Grøvdal (2006): 17% more parents in the control group sought care for children with chronic diseases | Not reported                                                                                                                                                                                         | Not calculated    | <br>VERY LOW   | CRITICAL   |
| Care-seeking for child illnesses (observational study) (studies: Kawakatsu, 2015 (Kenya); Zhou, 2015 (USA)) |                       |                      |               |                      |                           |                      |                                                                                                                                                    |                                                                                                                                                                            |                                                                                                                                                                                                      |                   |                                                                                                   |            |
| 2                                                                                                           | observational studies | not serious          | not serious   | not serious          | serious <sup>d</sup>      | none                 | Kawakatsu (2015): Fever: 1012/1331 (76.0%)<br>Diarrhea: 566/1331 (42.5%)<br><br>Zhou (2015): Unable to assess the number of events as not reported | Kawakatsu (2015): Fever: 476/652 (73.0%)<br>Diarrhea: 266/652 (40.8%)<br><br>Zhou (2015): Unable to assess the number of events as not reported                            | Kawakatsu (2015): Impact of 9.4 and 12.6 percentage points for care-seeking for fever and diarrhea, respectively<br>Zhou (2015): 21% more outpatient clinic visits and 26% more telephone encounters | Not calculated    | <br>VERY LOW | CRITICAL   |

| Quality assessment |              |              |               |              |             |                      | Nº of participants |         | Effect            |                   | Certainty | Importance |
|--------------------|--------------|--------------|---------------|--------------|-------------|----------------------|--------------------|---------|-------------------|-------------------|-----------|------------|
| Nº of studies      | Study design | Risk of bias | Inconsistency | Indirectness | Imprecision | Other considerations | Intervention       | Control | Relative (95% CI) | Absolute (95% CI) |           |            |

Use of health care and laboratory services (RCT) (study: Grøvdal, 2006 (Norway))

|   |                   |                      |             |             |                           |      |                                                                                                                                                                         |                                                                                                                                                                         |                                                                                                                                                      |                |                                                                                                 |          |
|---|-------------------|----------------------|-------------|-------------|---------------------------|------|-------------------------------------------------------------------------------------------------------------------------------------------------------------------------|-------------------------------------------------------------------------------------------------------------------------------------------------------------------------|------------------------------------------------------------------------------------------------------------------------------------------------------|----------------|-------------------------------------------------------------------------------------------------|----------|
| 1 | randomised trials | serious <sup>a</sup> | not serious | not serious | very serious <sup>a</sup> | none | Children with more encounters with healthcare services<br>Non-routine child health center (CHC): 35/155<br>Doctor outside CHC: 30/155<br>Specialist or hospital: 13/155 | Children with more encounters with healthcare services<br>Non-routine child health center (CHC): 35/154<br>Doctor outside CHC: 28/154<br>Specialist or hospital: 16/154 | Non-routine child health center (CHC): OR 0.99 (0.58-1.69)<br>Doctor outside CHC: OR 1.08 (0.61-1.91)<br>Specialist or hospital: OR 0.79 (0.37-1.70) | Not calculated | <br>VERY LOW | CRITICAL |
|---|-------------------|----------------------|-------------|-------------|---------------------------|------|-------------------------------------------------------------------------------------------------------------------------------------------------------------------------|-------------------------------------------------------------------------------------------------------------------------------------------------------------------------|------------------------------------------------------------------------------------------------------------------------------------------------------|----------------|-------------------------------------------------------------------------------------------------|----------|

Use of health care and laboratory services (observational study) (studies: Nakazawa, 2007 (Japan); Mudany, 2015 (Kenya))

|   |                       |                      |             |                      |             |      |                                                                                                                                                      |                  |              |                |                                                                                                 |          |
|---|-----------------------|----------------------|-------------|----------------------|-------------|------|------------------------------------------------------------------------------------------------------------------------------------------------------|------------------|--------------|----------------|-------------------------------------------------------------------------------------------------|----------|
| 2 | observational studies | serious <sup>f</sup> | not serious | serious <sup>g</sup> | not serious | none | Nakazawa (2007): 21/35 had normal hearing<br><br>Mudany (2015): HIV DNA testing in infants rose from 27,000 (2007) to 55,000 (2010) to 60,000 (2012) | No control group | Not reported | Not calculated | <br>VERY LOW | CRITICAL |
|---|-----------------------|----------------------|-------------|----------------------|-------------|------|------------------------------------------------------------------------------------------------------------------------------------------------------|------------------|--------------|----------------|-------------------------------------------------------------------------------------------------|----------|

Adherence to recommended immunizations (study: Tom, 2014 (USA))

|   |                       |             |             |             |             |      |                                      |                                      |                                |                |                                                                                            |          |
|---|-----------------------|-------------|-------------|-------------|-------------|------|--------------------------------------|--------------------------------------|--------------------------------|----------------|--------------------------------------------------------------------------------------------|----------|
| 1 | observational studies | not serious | not serious | not serious | not serious | none | KP Hawaii: 766<br>KP Northwest: 2795 | KP Hawaii: 766<br>KP Northwest: 2795 | KP Northwest: OR 1.2 (1.0-1.3) | Not calculated | <br>LOW | CRITICAL |
|---|-----------------------|-------------|-------------|-------------|-------------|------|--------------------------------------|--------------------------------------|--------------------------------|----------------|--------------------------------------------------------------------------------------------|----------|

Adherence to childcare visit recommendations (study: Tom, 2014 (USA))

|   |                       |             |             |             |             |      |                                      |                                      |                                                                   |                |                                                                                            |          |
|---|-----------------------|-------------|-------------|-------------|-------------|------|--------------------------------------|--------------------------------------|-------------------------------------------------------------------|----------------|--------------------------------------------------------------------------------------------|----------|
| 1 | observational studies | not serious | not serious | not serious | not serious | none | KP Hawaii: 766<br>KP Northwest: 2795 | KP Hawaii: 766<br>KP Northwest: 2795 | KP Hawaii: OR 1.9 (1.3-2.9)<br><br>KP Northwest: OR 2.5 (2.1-2.9) | Not calculated | <br>LOW | CRITICAL |
|---|-----------------------|-------------|-------------|-------------|-------------|------|--------------------------------------|--------------------------------------|-------------------------------------------------------------------|----------------|--------------------------------------------------------------------------------------------|----------|

CI: Confidence interval

Explanations

- a. Bias in measurement of the outcome.
- b. Population is children with chronic diseases in Grøvdal (2006)
- c. Unable to assess the number of events as not reported in Grøvdal (2006)
- d. Unable to assess the number of events as not reported
- e. Unable to assess the number of events as outcome data are ordinal
- f. Some methodological considerations and key potential confounding variables not measured nor adjusted statistically.
- g. Differences in outcome measurement.



**Question:** Should home-based records (intervention) compared to no use of any home-based records (control) be used for improving child healthcare knowledge?

| Quality assessment |              |              |               |              |             |                      | № of participants |         | Effect            |                   | Certainty | Importance |
|--------------------|--------------|--------------|---------------|--------------|-------------|----------------------|-------------------|---------|-------------------|-------------------|-----------|------------|
| № of studies       | Study design | Risk of bias | Inconsistency | Indirectness | Imprecision | Other considerations | Intervention      | Control | Relative (95% CI) | Absolute (95% CI) |           |            |

**General health (RCT) (assessed with: Grøvdal, 2006 (Norway))**

|   |                   |                      |             |             |                           |      |                                                                                                                                                                                                                                                |                                                                                                                                                                                                                                                |                                                                                                                                                                                                                                  |                |                                                                                                 |          |
|---|-------------------|----------------------|-------------|-------------|---------------------------|------|------------------------------------------------------------------------------------------------------------------------------------------------------------------------------------------------------------------------------------------------|------------------------------------------------------------------------------------------------------------------------------------------------------------------------------------------------------------------------------------------------|----------------------------------------------------------------------------------------------------------------------------------------------------------------------------------------------------------------------------------|----------------|-------------------------------------------------------------------------------------------------|----------|
| 1 | randomised trials | serious <sup>a</sup> | not serious | not serious | very serious <sup>b</sup> | none | Parents with improved knowledge on child's health<br>Newborns get the best view of me at a distance of 60 cm: 21/155<br>Call a doctor when child's temperature passes 39°C: 44/155<br>Let the child use a baby-walker or jumping-reins: 10/155 | Parents with improved knowledge on child's health<br>Newborns get the best view of me at a distance of 60 cm: 23/154<br>Call a doctor when child's temperature passes 39°C: 44/154<br>Let the child use a baby-walker or jumping-reins: 17/154 | Newborns get the best view of me at a distance of 60 cm: OR 0.89 (0.47-1.69)<br>Call a doctor when child's temperature passes 39°C: OR 0.99 (0.60-1.62)<br>Let the child use a baby-walker or jumping-reins: OR 0.56 (0.25-1.26) | Not calculated | <br>VERY LOW | CRITICAL |
|---|-------------------|----------------------|-------------|-------------|---------------------------|------|------------------------------------------------------------------------------------------------------------------------------------------------------------------------------------------------------------------------------------------------|------------------------------------------------------------------------------------------------------------------------------------------------------------------------------------------------------------------------------------------------|----------------------------------------------------------------------------------------------------------------------------------------------------------------------------------------------------------------------------------|----------------|-------------------------------------------------------------------------------------------------|----------|

**General health (observational study) (assessed with: Moore, 2000 (UK); Kawakatsu, 2015 (Kenya))**

|   |                       |                           |                      |             |                      |      |                                                                                                    |                                                                                                   |                                                                                                                                                                                       |                |                                                                                                 |          |
|---|-----------------------|---------------------------|----------------------|-------------|----------------------|------|----------------------------------------------------------------------------------------------------|---------------------------------------------------------------------------------------------------|---------------------------------------------------------------------------------------------------------------------------------------------------------------------------------------|----------------|-------------------------------------------------------------------------------------------------|----------|
| 2 | observational studies | very serious <sup>c</sup> | serious <sup>d</sup> | not serious | serious <sup>e</sup> | none | Moore (2000):<br>Not reported<br>Kawakatsu (2015):<br>Higher health knowledge:<br>1331/1331 (100%) | Moore (2000):<br>Not reported<br>Kawakatsu (2015):<br>Higher health knowledge:<br>650/652 (99.7%) | Moore (2000):<br>Not reported<br>Kawakatsu (2015):<br>Impact of 5.9 percentage points for higher health knowledge was statistically significant among users in the intervention group | Not calculated | <br>VERY LOW | CRITICAL |
|---|-----------------------|---------------------------|----------------------|-------------|----------------------|------|----------------------------------------------------------------------------------------------------|---------------------------------------------------------------------------------------------------|---------------------------------------------------------------------------------------------------------------------------------------------------------------------------------------|----------------|-------------------------------------------------------------------------------------------------|----------|

Immunization (assessed with: Oguchi, 2014 (Japan); Kamiya, 2016 (Japan); Nasir, 2017 (Indonesia))

|   |                       |                           |             |             |             |      |                                                                                                                                                                   |                  |                                                                                                                                                                     |                |                                                                                                  |          |
|---|-----------------------|---------------------------|-------------|-------------|-------------|------|-------------------------------------------------------------------------------------------------------------------------------------------------------------------|------------------|---------------------------------------------------------------------------------------------------------------------------------------------------------------------|----------------|--------------------------------------------------------------------------------------------------|----------|
| 3 | observational studies | very serious <sup>f</sup> | not serious | not serious | not serious | none | Oguchi (2014):<br>Motivation to vaccinate among mothers: 365/523 (70%)<br><br>Kamiya (2016):<br>Requested information on the vaccination schedule: 69/123 (56.1%) | No control group | Oguchi (2014):<br>70% of mothers was motivated to vaccinate their child<br><br>Kamiya (2016):<br>56.1% of mothers requested information on the vaccination schedule | Not calculated | <br>VERY LOW | CRITICAL |
|---|-----------------------|---------------------------|-------------|-------------|-------------|------|-------------------------------------------------------------------------------------------------------------------------------------------------------------------|------------------|---------------------------------------------------------------------------------------------------------------------------------------------------------------------|----------------|--------------------------------------------------------------------------------------------------|----------|

Exclusive breastfeeding (assessed with: Hagiwara, 2013 (Palestine); Aiga, 2016 (Vietnam))

| Quality assessment |                       |              |               |              |             |                      | Nº of participants                                                                                                                           |                  | Effect                                                                                                                                                                                                                                              |                   | Certainty   | Importance |
|--------------------|-----------------------|--------------|---------------|--------------|-------------|----------------------|----------------------------------------------------------------------------------------------------------------------------------------------|------------------|-----------------------------------------------------------------------------------------------------------------------------------------------------------------------------------------------------------------------------------------------------|-------------------|-------------|------------|
| Nº of studies      | Study design          | Risk of bias | Inconsistency | Indirectness | Imprecision | Other considerations | Intervention                                                                                                                                 | Control          | Relative (95% CI)                                                                                                                                                                                                                                   | Absolute (95% CI) |             |            |
| 2                  | observational studies | not serious  | not serious   | not serious  | not serious | none                 | Hagiwara (2013):<br>Number of events not reported<br>Aiga (2016):<br>Pre-intervention: 529/800 (66.1%)<br>Post-intervention: 702/810 (86.7%) | No control group | Hagiwara (2013):<br>Significant improvement on knowledge about exclusive breastfeeding among less educated women who are literate (p<0.05)<br>Aiga (2016): 20.6% of pregnant women and mothers showed improved knowledge on exclusive breastfeeding | Not calculated    | ⊕⊕○○<br>LOW | CRITICAL   |

Detection of biliary atresia (assessed with: Yamagiwa, 2009 (Japan); Hirayama, 2011 (Japan); Yokoi, 2019 (Japan))

|   |                       |                      |                      |             |             |      |                                                                                                                                                                                                                                                                                                                                                                                                       |                                                                                                                                                          |                                                                                                                                                                                                                                                                 |                |                  |          |
|---|-----------------------|----------------------|----------------------|-------------|-------------|------|-------------------------------------------------------------------------------------------------------------------------------------------------------------------------------------------------------------------------------------------------------------------------------------------------------------------------------------------------------------------------------------------------------|----------------------------------------------------------------------------------------------------------------------------------------------------------|-----------------------------------------------------------------------------------------------------------------------------------------------------------------------------------------------------------------------------------------------------------------|----------------|------------------|----------|
| 3 | observational studies | serious <sup>f</sup> | serious <sup>g</sup> | not serious | not serious | none | <p>Yamagiwa (2009):<br/>Knowledge on biliary atresia: 27/59<br/>Know the stool color of biliary atresia: 14/27<br/>Interest in biliary atresia: 52/59</p> <p>Hirayama (2011)<br/>Heard of biliary atresia: 77/239 (32.2%)<br/>Interest in biliary atresia: 137/237 (57.8%)<br/>Using the stool color card: 203/239 (84.9%)</p> <p>Yokoi (2019):<br/>Usefulness of stool color card: 36/41 (87.8%)</p> | <p>Yamagiwa (2009):<br/>Knowledge on biliary atresia: 19/58<br/>Know the stool color of biliary atresia: 3/18<br/>Interest in biliary atresia: 39/57</p> | <p>Yamagiwa (2009):<br/>Knowledge on biliary atresia: OR 1.73 (0.82-3.67)<br/>Know the stool color of biliary atresia: OR 5.38 (1.26-22.99)<br/>Interest in biliary atresia: OR 3.43 (1.30-9.01)</p> <p>Hirayama (2011) and Yokoi (2019):<br/>not estimable</p> | Not calculated | ⊕○○○<br>VERY LOW | CRITICAL |
|---|-----------------------|----------------------|----------------------|-------------|-------------|------|-------------------------------------------------------------------------------------------------------------------------------------------------------------------------------------------------------------------------------------------------------------------------------------------------------------------------------------------------------------------------------------------------------|----------------------------------------------------------------------------------------------------------------------------------------------------------|-----------------------------------------------------------------------------------------------------------------------------------------------------------------------------------------------------------------------------------------------------------------|----------------|------------------|----------|

Sudden infant syndrome (assessed with: Ichikawa, 2016 (Japan))

|   |                       |                      |             |             |             |      |                                                                                                                  |                  |                                                                          |                |                  |          |
|---|-----------------------|----------------------|-------------|-------------|-------------|------|------------------------------------------------------------------------------------------------------------------|------------------|--------------------------------------------------------------------------|----------------|------------------|----------|
| 1 | observational studies | serious <sup>f</sup> | not serious | not serious | not serious | none | <p>Knowledge with sudden infant death syndrome (SIDS): 118/378 (31.2%)<br/>Heard about SIDS: 234/378 (61.9%)</p> | No control group | 31.2% of mothers were knowledgeable about SIDS while 61.9% have heard it | Not calculated | ⊕○○○<br>VERY LOW | CRITICAL |
|---|-----------------------|----------------------|-------------|-------------|-------------|------|------------------------------------------------------------------------------------------------------------------|------------------|--------------------------------------------------------------------------|----------------|------------------|----------|

Accident prevention of infant (assessed with: Nokubo, 2006 (Japan) )

|   |                       |                      |             |             |             |      |                                                                                                  |                                                                                                   |                                                     |  |                  |          |
|---|-----------------------|----------------------|-------------|-------------|-------------|------|--------------------------------------------------------------------------------------------------|---------------------------------------------------------------------------------------------------|-----------------------------------------------------|--|------------------|----------|
| 1 | observational studies | serious <sup>f</sup> | not serious | not serious | not serious | none | <p>For those who have read the MCH handbook:<br/>Practice accident prevention: 49/55 (89.1%)</p> | <p>For those who did not read the MCH handbook:<br/>Practice accident prevention: 8/14(57.1%)</p> | Accident prevention of infant: OR 6.13 (1.58-23.77) |  | ⊕○○○<br>VERY LOW | CRITICAL |
|---|-----------------------|----------------------|-------------|-------------|-------------|------|--------------------------------------------------------------------------------------------------|---------------------------------------------------------------------------------------------------|-----------------------------------------------------|--|------------------|----------|

CI: Confidence interval

Explanations

- a. Bias in measurement of the outcome
- b. Unable to assess the number of events as outcome data are ordinal
- c. Bias in measurement of the outcome and selection of the reported result in Moore (2000)
- d. Moore (2000) reports no effect on outcome; Kawakatsu (2015) reports a significant effect
- e. No data was presented in Moore (2000)
- f. Some methodological concerns and key potential confounding variables not measured nor adjusted statistically
- g. Yamagiwa (2009) and Yokoi (2019) reported a mixed effect on outcome; Hirayama (2011) reports a significant effect

Question: Should home-based records (intervention) compared to no use of any home-based records (control) be used for improving child healthcare practices?

| Quality assessment                                               |                       |                      |               |              |                      |                      | Nº of participants                                                                |                  | Effect                    |                                                   | Certainty                                                                                         | Importance |
|------------------------------------------------------------------|-----------------------|----------------------|---------------|--------------|----------------------|----------------------|-----------------------------------------------------------------------------------|------------------|---------------------------|---------------------------------------------------|---------------------------------------------------------------------------------------------------|------------|
| Nº of studies                                                    | Study design          | Risk of bias         | Inconsistency | Indirectness | Imprecision          | Other considerations | Intervention                                                                      | Control          | Relative (95% CI)         | Absolute (95% CI)                                 |                                                                                                   |            |
| Exclusive breastfeeding (assessed with: Osaki, 2018 (Indonesia)) |                       |                      |               |              |                      |                      |                                                                                   |                  |                           |                                                   |                                                                                                   |            |
| 1                                                                | randomised trials     | serious <sup>a</sup> | not serious   | not serious  | serious <sup>b</sup> | none                 | 79/183 (43.2%)                                                                    | 132/271 (48.7%)  | OR 0.76<br>(0.51 to 1.14) | 68 fewer per 1,000<br>(from 161 fewer to 33 more) | <br>LOW        | CRITICAL   |
| Exclusive breastfeeding (assessed with: Aiga, 2016 (Vietnam))    |                       |                      |               |              |                      |                      |                                                                                   |                  |                           |                                                   |                                                                                                   |            |
| 1                                                                | observational studies | not serious          | not serious   | not serious  | not serious          | none                 | Pre-intervention:<br>146/800 (18.3%)<br><br>Post-intervention:<br>607/810 (74.9%) | No control group | Not reported              | Not calculated                                    | <br>LOW        | CRITICAL   |
| Continued breastfeeding (assessed with: Osaki, 2018 (Indonesia)) |                       |                      |               |              |                      |                      |                                                                                   |                  |                           |                                                   |                                                                                                   |            |
| 1                                                                | randomised trials     | serious <sup>a</sup> | not serious   | not serious  | not serious          | none                 | 167/183 (91.3%)                                                                   | 224/271 (82.7%)  | OR 2.31<br>(1.22 to 4.39) | 90 more per 1,000<br>(from 27 more to 128 more)   | <br>MODERATE | CRITICAL   |
| Complementary Feeding (assessed with: Osaki, 2018 (Indonesia))   |                       |                      |               |              |                      |                      |                                                                                   |                  |                           |                                                   |                                                                                                   |            |
| 1                                                                | randomised trials     | serious <sup>a</sup> | not serious   | not serious  | not serious          | none                 | 113/183 (61.7%)                                                                   | 74/271 (27.3%)   | OR 4.35<br>(2.85 to 6.65) | 347 more per 1,000<br>(from 244 more to 441 more) | <br>MODERATE | CRITICAL   |
| Proper feeding order (assessed with: Osaki, 2018 (Indonesia) )   |                       |                      |               |              |                      |                      |                                                                                   |                  |                           |                                                   |                                                                                                   |            |
| 1                                                                | randomised trials     | serious <sup>a</sup> | not serious   | not serious  | not serious          | none                 | 93/183 (50.8%)                                                                    | 73/271 (26.9%)   | OR 2.70<br>(1.79 to 4.09) | 229 more per 1,000<br>(from 128 more to 332 more) | <br>MODERATE | CRITICAL   |

| Quality assessment |              |              |               |              |             |                      | No of participants |         | Effect            |                   | Certainty | Importance |
|--------------------|--------------|--------------|---------------|--------------|-------------|----------------------|--------------------|---------|-------------------|-------------------|-----------|------------|
| No of studies      | Study design | Risk of bias | Inconsistency | Indirectness | Imprecision | Other considerations | Intervention       | Control | Relative (95% CI) | Absolute (95% CI) |           |            |

**Varied foods feeding (assessed with: Osaki, 2018 (Indonesia) )**

|   |                   |                      |             |             |             |      |                                                                                                                                                                                     |                                                                                                                                                                                     |                                                                                                                                                                                                                                 |                |                  |          |
|---|-------------------|----------------------|-------------|-------------|-------------|------|-------------------------------------------------------------------------------------------------------------------------------------------------------------------------------------|-------------------------------------------------------------------------------------------------------------------------------------------------------------------------------------|---------------------------------------------------------------------------------------------------------------------------------------------------------------------------------------------------------------------------------|----------------|------------------|----------|
| 1 | randomised trials | serious <sup>a</sup> | not serious | not serious | not serious | none | Fruits and/or fruits extract: 71/183 (38.8%)<br>Add Protein/ vitamin/ oil rich food to soft rice: 89/183 (48.6%)<br>Various snack food for two times between meals: 107/183 (58.5%) | Fruits and/or fruits extract: 62/271 (22.9%)<br>Add Protein/ vitamin/ oil rich food to soft rice: 101/271 (37.3%)<br>Various snack food for two times between meals: 70/271 (25.8%) | Fruits and/or fruits extract: <b>OR 2.18</b> (1.42 to 3.36)<br>Add Protein/ vitamin/ oil rich food to soft rice: <b>OR 1.54</b> (1.03 to 2.30)<br>Various snack food for two times between meals: <b>OR 4.14</b> (2.70 to 6.34) | Not calculated | ⊕⊕⊕○<br>MODERATE | CRITICAL |
|---|-------------------|----------------------|-------------|-------------|-------------|------|-------------------------------------------------------------------------------------------------------------------------------------------------------------------------------------|-------------------------------------------------------------------------------------------------------------------------------------------------------------------------------------|---------------------------------------------------------------------------------------------------------------------------------------------------------------------------------------------------------------------------------|----------------|------------------|----------|

**Self-feeding training (assessed with: Osaki, 2018 (Indonesia))**

|   |                   |                      |             |             |             |      |                |                |                               |                                                      |                  |           |
|---|-------------------|----------------------|-------------|-------------|-------------|------|----------------|----------------|-------------------------------|------------------------------------------------------|------------------|-----------|
| 1 | randomised trials | serious <sup>a</sup> | not serious | not serious | not serious | none | 65/183 (35.5%) | 45/271 (16.6%) | <b>OR 2.75</b> (1.74 to 4.36) | <b>188 more per 1,000</b> (from 91 more to 299 more) | ⊕⊕⊕○<br>MODERATE | IMPORTANT |
|---|-------------------|----------------------|-------------|-------------|-------------|------|----------------|----------------|-------------------------------|------------------------------------------------------|------------------|-----------|

**Recording immunizations (assessed with: Lakhani, 1984 (UK))**

|   |                   |                           |             |             |             |      |                                                              |                                                                                                 |              |                |             |          |
|---|-------------------|---------------------------|-------------|-------------|-------------|------|--------------------------------------------------------------|-------------------------------------------------------------------------------------------------|--------------|----------------|-------------|----------|
| 1 | randomised trials | very serious <sup>c</sup> | not serious | not serious | not serious | none | The proportion of booklets with entries on this page is low. | The information was still being recorded on an immunization card that had been used previously. | Not reported | Not calculated | ⊕⊕○○<br>LOW | CRITICAL |
|---|-------------------|---------------------------|-------------|-------------|-------------|------|--------------------------------------------------------------|-------------------------------------------------------------------------------------------------|--------------|----------------|-------------|----------|

**Recording immunizations (assessed with: Mukanga, 2006 (Uganda); Brown, 2018 (Kenya); Enokido, 1965 (Japan); Fujimoto, 2001 (Japan))**

|   |                       |                      |                      |             |             |      |                                                                                                                                                                                                                                                                                            |  |                                               |                |                  |          |
|---|-----------------------|----------------------|----------------------|-------------|-------------|------|--------------------------------------------------------------------------------------------------------------------------------------------------------------------------------------------------------------------------------------------------------------------------------------------|--|-----------------------------------------------|----------------|------------------|----------|
| 4 | observational studies | serious <sup>d</sup> | serious <sup>e</sup> | not serious | not serious | none | Mukanga (2006): Card seen, record immunization: 160/172 (93.0%)<br>Card not seen, record immunization: 81/88 (92.0%)<br><br>Brown (2018): Vaccination history (82%)<br><br>Enokido (1965): Vaccination records (30.7%)<br><br>Fujimoto (2001): Most useful page was the vaccination record |  | Mukanga (2006): <b>OR 1.63</b> (0.44 to 3.17) | Not calculated | ⊕○○○<br>VERY LOW | CRITICAL |
|---|-----------------------|----------------------|----------------------|-------------|-------------|------|--------------------------------------------------------------------------------------------------------------------------------------------------------------------------------------------------------------------------------------------------------------------------------------------|--|-----------------------------------------------|----------------|------------------|----------|

**Growth monitoring (assessed with: Mukanga, 2006 (Uganda); Hamilton, 2012 (Australia); Araujo, 2017 (Brazil); Enokido, 1965 (Japan); Hokama, 2000 (Japan); Aoki, 2009 (Japan); Shibahara, 2010 (Japan); Fujii, 2020 (Japan))**

|   |                       |                      |                      |             |             |      |                                                    |  |                |                |                  |          |
|---|-----------------------|----------------------|----------------------|-------------|-------------|------|----------------------------------------------------|--|----------------|----------------|------------------|----------|
| 8 | observational studies | serious <sup>d</sup> | serious <sup>e</sup> | not serious | not serious | none | Mixed results were obtained for growth monitoring. |  | Not calculated | Not calculated | ⊕○○○<br>VERY LOW | CRITICAL |
|---|-----------------------|----------------------|----------------------|-------------|-------------|------|----------------------------------------------------|--|----------------|----------------|------------------|----------|

CI: Confidence interval; OR: Odds ratio

Explanations

- a. Bias in measurement of the outcome and some concerns in the randomization process.
- b. Low number of events (<300)
- c. Bias due to deviations from intended intervention, missing outcome data, measurement of the outcome.
- d. Some methodological considerations and key potential confounding variables not measured nor adjusted statistically.
- e. Findings showed mixed results.

Question: Should home-based records (intervention) compared to no use of any home-based records (control) be used for infant and child illness management?

| Quality assessment                                                         |                       |                      |               |                           |                      |                      | № of participants                                                  |                  | Effect                    |                                                   | Certainty                                                                                         | Importance |
|----------------------------------------------------------------------------|-----------------------|----------------------|---------------|---------------------------|----------------------|----------------------|--------------------------------------------------------------------|------------------|---------------------------|---------------------------------------------------|---------------------------------------------------------------------------------------------------|------------|
| № of studies                                                               | Study design          | Risk of bias         | Inconsistency | Indirectness              | Imprecision          | Other considerations | Intervention                                                       | Control          | Relative (95% CI)         | Absolute (95% CI)                                 |                                                                                                   |            |
| Home care for cough (assessed with: Osaki, 2018 (Indonesia))               |                       |                      |               |                           |                      |                      |                                                                    |                  |                           |                                                   |                                                                                                   |            |
| 1                                                                          | randomised trials     | serious <sup>a</sup> | not serious   | not serious               | serious <sup>b</sup> | none                 | 36/45 (80.0%)                                                      | 32/60 (53.3%)    | OR 3.50<br>(1.44 to 8.52) | 267 more per 1,000<br>(from 89 more to 374 more)  | <br>LOW        | CRITICAL   |
| Home care for diarrhea (assessed with: Osaki, 2018 (Indonesia))            |                       |                      |               |                           |                      |                      |                                                                    |                  |                           |                                                   |                                                                                                   |            |
| 1                                                                          | randomised trials     | serious <sup>a</sup> | not serious   | serious <sup>c</sup>      | serious <sup>b</sup> | none                 | 20/24 (83.3%)                                                      | 25/27 (92.6%)    | OR 0.40<br>(0.07 to 2.40) | 93 fewer per 1,000<br>(from 459 fewer to 42 more) | <br>VERY LOW   | CRITICAL   |
| Home care for diarrhea (assessed with: Shimizu, 2007 (Dominican Republic)) |                       |                      |               |                           |                      |                      |                                                                    |                  |                           |                                                   |                                                                                                   |            |
| 1                                                                          | observational studies | serious <sup>d</sup> | not serious   | very serious <sup>a</sup> | not serious          | none                 | Common problems such as diarrhea decreased. No data was presented. | No control group | Not calculated            | Not calculated                                    | <br>VERY LOW   | CRITICAL   |
| Vitamin A use (assessed with: Osaki, 2018 (Indonesia))                     |                       |                      |               |                           |                      |                      |                                                                    |                  |                           |                                                   |                                                                                                   |            |
| 1                                                                          | randomised trials     | serious <sup>a</sup> | not serious   | not serious               | not serious          | none                 | 160/183 (87.4%)                                                    | 205/271 (75.6%)  | OR 2.00<br>(1.16 to 3.47) | 105 more per 1,000<br>(from 26 more to 159 more)  | <br>MODERATE | CRITICAL   |

CI: Confidence interval; OR: Odds ratio

Explanations

- a. Bias in measurement of the outcome and some concerns in the randomization process.
- b. Very low number of events (<100)
- c. Diarrhea is only one of the possible illnesses.
- d. Some methodological considerations and key potential confounding variables not measured nor adjusted statistically.
- e. No data was presented.

Question: Should home-based records (intervention) compared to no use of any home-based records (control) be used for improving child mortality and morbidity?

| Quality assessment                                                  |                   |                      |               |              |                           |                      | № of participants |                 | Effect                    |                                                     | Certainty                                                                                       | Importance |
|---------------------------------------------------------------------|-------------------|----------------------|---------------|--------------|---------------------------|----------------------|-------------------|-----------------|---------------------------|-----------------------------------------------------|-------------------------------------------------------------------------------------------------|------------|
| № of studies                                                        | Study design      | Risk of bias         | Inconsistency | Indirectness | Imprecision               | Other considerations | Intervention      | Control         | Relative (95% CI)         | Absolute (95% CI)                                   |                                                                                                 |            |
| Underweight children (assessed with: Osaki, 2018 (Indonesia) )      |                   |                      |               |              |                           |                      |                   |                 |                           |                                                     |                                                                                                 |            |
| 1                                                                   | randomised trials | serious <sup>a</sup> | not serious   | not serious  | very serious <sup>b</sup> | none                 | 7/135 (5.2%)      | 35/250 (14.0%)  | OR 0.33<br>(0.12 to 0.94) | 89 fewer per 1,000<br>(from 121 fewer to 7 fewer)   | <br>VERY LOW | IMPORTANT  |
| Stunted growth (assessed with: Osaki, 2018 (Indonesia))             |                   |                      |               |              |                           |                      |                   |                 |                           |                                                     |                                                                                                 |            |
| 1                                                                   | randomised trials | serious <sup>a</sup> | not serious   | not serious  | serious <sup>c</sup>      | none                 | 35/133 (26.3%)    | 100/248 (40.3%) | OR 0.53<br>(0.30 to 0.92) | 140 fewer per 1,000<br>(from 235 fewer to 20 fewer) | <br>LOW      | IMPORTANT  |
| Wasting (assessed with: Osaki, 2018 (Indonesia))                    |                   |                      |               |              |                           |                      |                   |                 |                           |                                                     |                                                                                                 |            |
| 1                                                                   | randomised trials | serious <sup>a</sup> | not serious   | not serious  | very serious <sup>b</sup> | none                 | 10/133 (7.5%)     | 30/248 (12.1%)  | OR 0.59<br>(0.24 to 1.47) | 46 fewer per 1,000<br>(from 89 fewer to 47 more)    | <br>VERY LOW | IMPORTANT  |
| Risk of cognitive delay (assessed with: Dagvadorj, 2017 (Mongolia)) |                   |                      |               |              |                           |                      |                   |                 |                           |                                                     |                                                                                                 |            |
| 1                                                                   | randomised trials | serious <sup>d</sup> | not serious   | not serious  | very serious <sup>b</sup> | none                 | 17/214 (7.9%)     | 24/172 (14.0%)  | OR 0.32<br>(0.14 to 0.73) | 90 fewer per 1,000<br>(from 117 fewer to 34 fewer)  | <br>VERY LOW | IMPORTANT  |

CI: Confidence interval; OR: Odds ratio

## Explanations

- a. Bias in measurement of the outcome and some concerns in the randomization process.
- b. Very low number of events (<100)
- c. Low number of events (<300)
- d. Bias in measurement of the outcome and selection of the reported result.

Question: Should home-based records (intervention) compared to no use of any home-based records (control) be used for improving the continuum of care?

| Quality assessment                                                                                                                                                                                                    |                       |                      |               |              |                           |                                                  | № of participants |                | Effect                     |                                                  | Certainty                                                                                       | Importance |
|-----------------------------------------------------------------------------------------------------------------------------------------------------------------------------------------------------------------------|-----------------------|----------------------|---------------|--------------|---------------------------|--------------------------------------------------|-------------------|----------------|----------------------------|--------------------------------------------------|-------------------------------------------------------------------------------------------------|------------|
| № of studies                                                                                                                                                                                                          | Study design          | Risk of bias         | Inconsistency | Indirectness | Imprecision               | Other considerations                             | Intervention      | Control        | Relative (95% CI)          | Absolute (95% CI)                                |                                                                                                 |            |
| Continuum of care (Maternal and newborn: TT2, ANC4, SBA,) (assessed with: Osaki, 2018 (Indonesia))                                                                                                                    |                       |                      |               |              |                           |                                                  |                   |                |                            |                                                  |                                                                                                 |            |
| 1                                                                                                                                                                                                                     | randomised trials     | serious <sup>a</sup> | not serious   | not serious  | serious <sup>b</sup>      | none                                             | 53/183 (29.0%)    | 50/271 (18.5%) | OR 1.46<br>(0.89 to 2.40)  | 64 more per 1,000<br>(from 17 fewer to 167 more) | <br>LOW      | CRITICAL   |
| Continuum of care (Maternal and newborn: TT2, ANC4, SBA, VitA, ExBF) (assessed with: Osaki, 2018 (Indonesia))                                                                                                         |                       |                      |               |              |                           |                                                  |                   |                |                            |                                                  |                                                                                                 |            |
| 1                                                                                                                                                                                                                     | randomised trials     | serious <sup>a</sup> | not serious   | not serious  | very serious <sup>c</sup> | none                                             | 31/183 (16.9%)    | 22/271 (8.1%)  | OR 2.38<br>(1.22 to 4.64)  | 93 more per 1,000<br>(from 16 more to 210 more)  | <br>VERY LOW | CRITICAL   |
| Continuum of care (Maternal and newborn: TT2, ANC4, SBA, VitA, ExBF, started CF in 6-9 months) (assessed with: Osaki, 2018 (Indonesia))                                                                               |                       |                      |               |              |                           |                                                  |                   |                |                            |                                                  |                                                                                                 |            |
| 1                                                                                                                                                                                                                     | randomised trials     | serious <sup>a</sup> | not serious   | not serious  | very serious <sup>c</sup> | Large effect in positive direction, but wide CIs | 22/183 (12.0%)    | 5/271 (1.8%)   | OR 7.13<br>(2.43 to 20.90) | 100 more per 1,000<br>(from 25 more to 264 more) | <br>VERY LOW | CRITICAL   |
| Continuum of care (assessed with: Shah, 1993 (Multi-countries); Aiga, 2016 (Vietnam); Kaneko, 2017 (Burundi); Osaki, 2013 (Indonesia); Shimizu, 2007 (Dominican Republic); Yuge, 2010 (Japan); Adachi, 2010 (Japan) ) |                       |                      |               |              |                           |                                                  |                   |                |                            |                                                  |                                                                                                 |            |
| 7                                                                                                                                                                                                                     | observational studies | serious <sup>d</sup> | not serious   | not serious  | not serious               | none                                             | Not estimable     | Not estimable  | Not calculated             | Not calculated                                   | <br>VERY LOW | CRITICAL   |

CI: Confidence interval; OR: Odds ratio

## Explanations

- a. Bias in measurement of the outcome and some concerns in the randomization process.
- b. A low number of events (<300)
- c. A very low number of events (<100) and wide confidence intervals
- d. Some methodological considerations and key potential confounding variables not measured nor adjusted statistically.

**Question:** Should a different type of home-based record (intervention) compared to a standard home-based record (control) be used for improving children vaccination use/uptake?

| Quality assessment                                                              |                   |                      |               |              |             |                      | № of participants |                 | Effect                    |                                                  | Certainty                                                                                       | Importance |
|---------------------------------------------------------------------------------|-------------------|----------------------|---------------|--------------|-------------|----------------------|-------------------|-----------------|---------------------------|--------------------------------------------------|-------------------------------------------------------------------------------------------------|------------|
| № of studies                                                                    | Study design      | Risk of bias         | Inconsistency | Indirectness | Imprecision | Other considerations | Intervention      | Control         | Relative (95% CI)         | Absolute (95% CI)                                |                                                                                                 |            |
| DTP3 completion (assessed with: Usman, 2009 (Pakistan); Usman, 2011 (Pakistan)) |                   |                      |               |              |             |                      |                   |                 |                           |                                                  |                                                                                                 |            |
| 2                                                                               | randomised trials | serious <sup>a</sup> | not serious   | not serious  | not serious | none                 | 511/753 (67.9%)   | 354/753 (47.0%) | OR 2.39<br>(1.45 to 3.92) | 209 more per 1,000<br>(from 93 more to 307 more) | <br>MODERATE | CRITICAL   |

CI: Confidence interval; OR: Odds ratio

Explanations

a. Bias in measurement of the outcome.

**Question:** Should a different type of home-based record (intervention) compared to a standard home-based record (control) be used for improving childcare-seeking?

| Quality assessment                                                                     |                       |                      |               |              |                      |                      | № of participants                                          |                                                            | Effect            |                   | Certainty                                                                                        | Importance |
|----------------------------------------------------------------------------------------|-----------------------|----------------------|---------------|--------------|----------------------|----------------------|------------------------------------------------------------|------------------------------------------------------------|-------------------|-------------------|--------------------------------------------------------------------------------------------------|------------|
| № of studies                                                                           | Study design          | Risk of bias         | Inconsistency | Indirectness | Imprecision          | Other considerations | Intervention                                               | Control                                                    | Relative (95% CI) | Absolute (95% CI) |                                                                                                  |            |
| Adherence to the recommended immunizations (assessed with: Bhuiyan, 2006 (Bangladesh)) |                       |                      |               |              |                      |                      |                                                            |                                                            |                   |                   |                                                                                                  |            |
| 1                                                                                      | observational studies | serious <sup>a</sup> | not serious   | not serious  | serious <sup>b</sup> | none                 | 8.3% of the mothers adhered to the recommended vaccination | 1.5% of the mothers adhered to the recommended vaccination | Not calculated    | Not calculated    | <br>VERY LOW | CRITICAL   |

CI: Confidence interval

Explanations

a. The integration and inconsistencies between quantitative and qualitative results are not adequately addressed.  
b. Unable to assess the number of events as not reported



**Question:** Should a different type of home-based record (intervention) compared to a standard home-based record (control) be used for improving child healthcare knowledge?

| Quality assessment                                       |                       |                      |               |              |                      |                      | № of participants                                                               |                                                                    | Effect            |                   | Certainty                                                                                    | Importance |
|----------------------------------------------------------|-----------------------|----------------------|---------------|--------------|----------------------|----------------------|---------------------------------------------------------------------------------|--------------------------------------------------------------------|-------------------|-------------------|----------------------------------------------------------------------------------------------|------------|
| № of studies                                             | Study design          | Risk of bias         | Inconsistency | Indirectness | Imprecision          | Other considerations | Intervention                                                                    | Control                                                            | Relative (95% CI) | Absolute (95% CI) |                                                                                              |            |
| Immunization (assessed with: Bhuiyan, 2006 (Bangladesh)) |                       |                      |               |              |                      |                      |                                                                                 |                                                                    |                   |                   |                                                                                              |            |
| 1                                                        | observational studies | serious <sup>a</sup> | not serious   | not serious  | serious <sup>b</sup> | none                 | 32.4% of mothers showed significant improvement in knowledge about immunization | 5.7% of mothers showed improvement in knowledge about immunization | Not calculated    | Not calculated    |  VERY LOW | CRITICAL   |

|                                                                     |                       |                      |             |             |                      |      |                                                                                            |                                                                               |                |                |                                                                                              |          |
|---------------------------------------------------------------------|-----------------------|----------------------|-------------|-------------|----------------------|------|--------------------------------------------------------------------------------------------|-------------------------------------------------------------------------------|----------------|----------------|----------------------------------------------------------------------------------------------|----------|
| Exclusive breastfeeding (assessed with: Bhuiyan, 2006 (Bangladesh)) |                       |                      |             |             |                      |      |                                                                                            |                                                                               |                |                |                                                                                              |          |
| 1                                                                   | observational studies | serious <sup>a</sup> | not serious | not serious | serious <sup>b</sup> | none | 28.7% of mothers showed significant improvement in knowledge about exclusive breastfeeding | 4.6% of mothers showed improvement in knowledge about exclusive breastfeeding | Not calculated | Not calculated |  VERY LOW | CRITICAL |

CI: Confidence interval

Explanations

- a. The integration and inconsistencies between quantitative and qualitative results are not adequately addressed.  
b. Unable to assess the number of events as not reported

**Question:** Should a different type of home-based record (intervention) compared to a standard home-based record (control) be used for improving child healthcare practices?

| Quality assessment                                                  |                       |                      |               |              |                      |                      | № of participants                                      |                                                       | Effect            |                   | Certainty                                                                                         | Importance |
|---------------------------------------------------------------------|-----------------------|----------------------|---------------|--------------|----------------------|----------------------|--------------------------------------------------------|-------------------------------------------------------|-------------------|-------------------|---------------------------------------------------------------------------------------------------|------------|
| № of studies                                                        | Study design          | Risk of bias         | Inconsistency | Indirectness | Imprecision          | Other considerations | Intervention                                           | Control                                               | Relative (95% CI) | Absolute (95% CI) |                                                                                                   |            |
| Exclusive breastfeeding (assessed with: Bhuiyan, 2006 (Bangladesh)) |                       |                      |               |              |                      |                      |                                                        |                                                       |                   |                   |                                                                                                   |            |
| 1                                                                   | observational studies | serious <sup>a</sup> | not serious   | not serious  | serious <sup>b</sup> | none                 | 16.9% of the mothers practiced exclusive breastfeeding | 0.7% of the mothers practiced exclusive breastfeeding | Not calculated    | Not calculated    | <br>VERY LOW | CRITICAL   |

CI: Confidence interval

Explanations

- a. The integration and inconsistencies between quantitative and qualitative results are not adequately addressed.  
b. Unable to assess the number of events as not reported

**Question:** Should a different type of home-based record (intervention) compared to a standard home-based record (control) be used for improving infant and child illness management?

| Quality assessment                                         |                       |                      |               |              |                      |                      | № of participants                   |                                    | Effect            |                   | Certainty                                                                                       | Importance |
|------------------------------------------------------------|-----------------------|----------------------|---------------|--------------|----------------------|----------------------|-------------------------------------|------------------------------------|-------------------|-------------------|-------------------------------------------------------------------------------------------------|------------|
| № of studies                                               | Study design          | Risk of bias         | Inconsistency | Indirectness | Imprecision          | Other considerations | Intervention                        | Control                            | Relative (95% CI) | Absolute (95% CI) |                                                                                                 |            |
| Vitamin A use (assessed with: Bhuiyan, 2006 (Bangladesh) ) |                       |                      |               |              |                      |                      |                                     |                                    |                   |                   |                                                                                                 |            |
| 1                                                          | observational studies | serious <sup>a</sup> | not serious   | not serious  | serious <sup>b</sup> | none                 | 17.6% of the mothers used Vitamin A | 1.4% of the mothers used Vitamin A | Not calculated    | Not calculated    | <br>VERY LOW | CRITICAL   |

CI: Confidence interval

## Explanations

- a. The integration and inconsistencies between quantitative and qualitative results are not adequately addressed.  
b. Unable to assess the number of events as not reported
